# Supplementary material for: An Ensemble Method for Feature Screening
Source: MDPI journal article supplement (doi:10.3390/math11020362), 2023-01-10
Supplement: s1 [file s1]

# Supplementary Materials of “An Ensemble Method for Feature Screening”

Xi Wu<sup>1</sup>, Shifeng Xiong<sup>2</sup>, and Weiyan Mu<sup>3</sup>

<sup>1</sup> National Cancer Center/National Clinical Research Center for Cancer/Cancer Hospital,  
Chinese Academy of Medical Sciences and Peking Union Medical College, Beijing 100021,  
China

<sup>2</sup> NCMIS, KLSC, Academy of Mathematics and Systems Science  
Chinese Academy of Sciences, Beijing 100190, China

<sup>3</sup> School of Science,  
Beijing University of Civil Engineering and Architecture, Beijing 100044, China

**Abstract** The Supplementary Materials are organized as follows. Section A presents simulation results with analytic functions for regression and classification. Section B provides all proofs.

## A Simulations for regression and classification

### A.1 Regression

Here we also consider the test functions in Section 5.1, but assign random errors  $\varepsilon_i \sim N(0, \sigma^2)$  in the responses. The data of predictors are generated from the uniform distribution (UD),  $\mathbf{X}_1, \dots, \mathbf{X}_n$  identically and independently distributed from  $U(0, 1)^p$ , or the normal distribution (ND),  $\mathbf{X}_1, \dots, \mathbf{X}_n$  identically and independently distributed from  $N(\mathbf{1}_p/2, \Sigma)$ , where  $\Sigma = (\sigma_{ij})_{i,j=1,\dots,p}$  with  $\sigma_{ii} = 1$  for  $i = 1, \dots, p$  and  $\sigma_{ij} = \rho$  for  $i \neq j$ . For each test function, the selections of  $n$ ,  $p$ ,  $p_0$ ,  $\sigma$ ,  $\rho$ , and the distribution of the predictors are displayed in Table S1.

The coverage rates that the selected subset include the true submodel over 1000 repetitions are given in Table S1. We also conduct a simulation for equation (3) in Exam-

Table S1: Coverage rates in regression

| function (I), $\sigma = 1$ , UD |                    |            |                    |            |                     |            |
|---------------------------------|--------------------|------------|--------------------|------------|---------------------|------------|
|                                 | $n = 100, p = 150$ |            | $n = 200, p = 500$ |            | $n = 400, p = 2000$ |            |
|                                 | $p_0 = 5$          | $p_0 = 10$ | $p_0 = 5$          | $p_0 = 10$ | $p_0 = 5$           | $p_0 = 10$ |
| DC-SIS                          | 0.234              | 0.004      | 0.242              | 0.016      | 0.471               | 0.060      |
| MDC-SIS                         | 0.260              | 0.006      | 0.263              | 0.039      | 0.537               | 0.081      |
| LSLB                            | 0.730              | 0.295      | 0.876              | 0.551      | 0.993               | 0.811      |
| LSQB                            | 0.833              | 0.742      | 0.955              | 0.949      | 0.998               | 0.963      |
| ensemble ( $\delta = 0.6$ )     | 0.807              | 0.742      | 0.954              | 0.949      | 0.998               | 0.963      |
| ensemble ( $\delta = 0.7$ )     | 0.807              | 0.742      | 0.953              | 0.945      | 0.998               | 0.961      |
| ensemble ( $\delta = 0.8$ )     | 0.807              | 0.742      | 0.950              | 0.945      | 0.990               | 0.955      |

  

| function (II), $\sigma = 1/4$ , UD |                    |            |                    |            |                     |            |
|------------------------------------|--------------------|------------|--------------------|------------|---------------------|------------|
|                                    | $n = 100, p = 150$ |            | $n = 200, p = 500$ |            | $n = 400, p = 2000$ |            |
|                                    | $p_0 = 5$          | $p_0 = 10$ | $p_0 = 5$          | $p_0 = 10$ | $p_0 = 5$           | $p_0 = 10$ |
| DC-SIS                             | 0.884              | 0.018      | 0.999              | 0.287      | 1.000               | 0.882      |
| MDC-SIS                            | 0.915              | 0.024      | 1.000              | 0.389      | 1.000               | 0.902      |
| LSLB                               | 0.975              | 0.086      | 1.000              | 0.613      | 1.000               | 0.988      |
| LSQB                               | 0.655              | 0.004      | 0.974              | 0.108      | 1.000               | 0.634      |
| ensemble ( $\delta = 0.6$ )        | 0.979              | 0.087      | 1.000              | 0.610      | 1.000               | 0.988      |
| ensemble ( $\delta = 0.7$ )        | 0.973              | 0.086      | 1.000              | 0.589      | 1.000               | 0.985      |
| ensemble ( $\delta = 0.8$ )        | 0.919              | 0.030      | 1.000              | 0.324      | 1.000               | 0.890      |

  

| function (III), $\sigma = 1/10$ , UD |                    |            |                    |            |                     |            |
|--------------------------------------|--------------------|------------|--------------------|------------|---------------------|------------|
|                                      | $n = 100, p = 150$ |            | $n = 200, p = 500$ |            | $n = 400, p = 2000$ |            |
|                                      | $p_0 = 5$          | $p_0 = 10$ | $p_0 = 5$          | $p_0 = 10$ | $p_0 = 5$           | $p_0 = 10$ |
| DC-SIS                               | 0.895              | 0.062      | 0.995              | 0.582      | 1.000               | 0.966      |
| MDC-SIS                              | 0.924              | 0.100      | 0.995              | 0.687      | 1.000               | 0.970      |
| LSLB                                 | 0.980              | 0.494      | 1.000              | 0.998      | 1.000               | 0.997      |
| LSQB                                 | 0.998              | 0.668      | 1.000              | 1.000      | 1.000               | 1.000      |
| ensemble ( $\delta = 0.6$ )          | 0.995              | 0.629      | 1.000              | 0.999      | 1.000               | 1.000      |
| ensemble ( $\delta = 0.7$ )          | 0.991              | 0.628      | 1.000              | 0.998      | 1.000               | 1.000      |
| ensemble ( $\delta = 0.8$ )          | 0.945              | 0.497      | 1.000              | 0.865      | 1.000               | 0.991      |

  

| function (IV), $\sigma = 1/2$ , $p_0 = 3$ , ND |                    |              |                    |              |                    |              |
|------------------------------------------------|--------------------|--------------|--------------------|--------------|--------------------|--------------|
|                                                | $n = 100, p = 100$ |              | $n = 200, p = 300$ |              | $n = 400, p = 800$ |              |
|                                                | $\rho = 0$         | $\rho = 0.5$ | $\rho = 0$         | $\rho = 0.5$ | $\rho = 0$         | $\rho = 0.5$ |
| DC-SIS                                         | 0.719              | 0.620        | 0.879              | 0.709        | 0.996              | 0.883        |
| MDC-SIS                                        | 0.603              | 0.514        | 0.786              | 0.592        | 0.933              | 0.788        |
| LSLB                                           | 0.593              | 0.177        | 0.826              | 0.354        | 0.952              | 0.476        |
| LSQB                                           | 0.499              | 0.660        | 0.742              | 0.772        | 0.887              | 0.859        |
| ensemble ( $\delta = 0.6$ )                    | 0.763              | 0.706        | 0.896              | 0.772        | 0.983              | 0.879        |
| ensemble ( $\delta = 0.7$ )                    | 0.749              | 0.706        | 0.879              | 0.772        | 0.991              | 0.881        |
| ensemble ( $\delta = 0.8$ )                    | 0.736              | 0.706        | 0.879              | 0.772        | 0.999              | 0.883        |

  

| function (V), $\sigma = 1/10$ , $p_0 = 3$ , ND |                    |              |                    |              |                    |              |
|------------------------------------------------|--------------------|--------------|--------------------|--------------|--------------------|--------------|
|                                                | $n = 100, p = 100$ |              | $n = 200, p = 300$ |              | $n = 400, p = 800$ |              |
|                                                | $\rho = 0$         | $\rho = 0.5$ | $\rho = 0$         | $\rho = 0.5$ | $\rho = 0$         | $\rho = 0.5$ |
| DC-SIS                                         | 0.927              | 0.952        | 1.000              | 0.995        | 1.000              | 1.000        |
| MDC-SIS                                        | 0.125              | 0.870        | 0.083              | 0.981        | 0.040              | 0.998        |
| LSLB                                           | 0.024              | 0.656        | 0.010              | 0.906        | 0.012              | 1.000        |
| LSQB                                           | 0.023              | 0.094        | 0.010              | 0.064        | 0.001              | 0.081        |
| ensemble ( $\delta = 0.6$ )                    | 0.903              | 0.800        | 0.986              | 0.829        | 1.000              | 0.973        |
| ensemble ( $\delta = 0.7$ )                    | 0.923              | 0.814        | 1.000              | 0.932        | 1.000              | 0.993        |
| ensemble ( $\delta = 0.8$ )                    | 0.927              | 0.887        | 1.000              | 0.986        | 1.000              | 1.000        |

Table S2: Coverage rates in classification

|                             | $n = 100, p = 100$ |           | $n = 200, p = 400$ |           | $n = 400, p = 1000$ |           |
|-----------------------------|--------------------|-----------|--------------------|-----------|---------------------|-----------|
|                             | $p_0 = 3$          | $p_0 = 5$ | $p_0 = 3$          | $p_0 = 5$ | $p_0 = 3$           | $p_0 = 5$ |
| Case (A)                    |                    |           |                    |           |                     |           |
| DC-SIS                      | 0.883              | 0.301     | 0.973              | 0.491     | 1.000               | 0.920     |
| MDC-SIS                     | 0.883              | 0.301     | 0.973              | 0.492     | 1.000               | 0.920     |
| MV-SIS                      | 0.870              | 0.276     | 0.968              | 0.473     | 1.000               | 0.899     |
| LSLB                        | 0.935              | 0.562     | 0.998              | 0.913     | 1.000               | 0.995     |
| LSQB                        | 0.429              | 0.013     | 0.583              | 0.017     | 0.855               | 0.065     |
| ensemble ( $\delta = 0.6$ ) | 0.918              | 0.557     | 0.987              | 0.913     | 1.000               | 0.991     |
| ensemble ( $\delta = 0.7$ ) | 0.919              | 0.557     | 0.987              | 0.913     | 1.000               | 0.991     |
| ensemble ( $\delta = 0.8$ ) | 0.917              | 0.557     | 0.987              | 0.911     | 1.000               | 0.988     |
| Case (B)                    |                    |           |                    |           |                     |           |
| DC-SIS                      | 0.779              | 0.107     | 0.884              | 0.184     | 0.987               | 0.461     |
| MDC-SIS                     | 0.779              | 0.107     | 0.884              | 0.184     | 0.987               | 0.461     |
| MV-SIS                      | 0.735              | 0.122     | 0.828              | 0.192     | 0.965               | 0.427     |
| LSLB                        | 0.331              | 0.003     | 0.436              | 0.001     | 0.728               | 0.033     |
| LSQB                        | 0.981              | 0.261     | 1.000              | 0.532     | 1.000               | 0.933     |
| ensemble ( $\delta = 0.6$ ) | 0.964              | 0.226     | 0.988              | 0.428     | 1.000               | 0.866     |
| ensemble ( $\delta = 0.7$ ) | 0.964              | 0.226     | 0.988              | 0.428     | 1.000               | 0.866     |
| ensemble ( $\delta = 0.8$ ) | 0.962              | 0.226     | 0.987              | 0.426     | 1.000               | 0.866     |
| Case (C)                    |                    |           |                    |           |                     |           |
| DC-SIS                      | 0.814              | 0.073     | 0.924              | 0.228     | 0.994               | 0.468     |
| MDC-SIS                     | 0.814              | 0.073     | 0.924              | 0.228     | 0.994               | 0.468     |
| MV-SIS                      | 0.767              | 0.083     | 0.865              | 0.227     | 0.981               | 0.437     |
| LSLB                        | 0.395              | 0.000     | 0.527              | 0.005     | 0.820               | 0.014     |
| LSQB                        | 0.994              | 0.158     | 0.996              | 0.608     | 1.000               | 0.923     |
| ensemble ( $\delta = 0.6$ ) | 0.978              | 0.128     | 0.993              | 0.472     | 0.997               | 0.822     |
| ensemble ( $\delta = 0.7$ ) | 0.978              | 0.128     | 0.993              | 0.472     | 0.997               | 0.822     |
| ensemble ( $\delta = 0.8$ ) | 0.978              | 0.128     | 0.993              | 0.471     | 0.995               | 0.822     |
| Case (D)                    |                    |           |                    |           |                     |           |
| DC-SIS                      | 0.750              | 0.078     | 0.971              | 0.205     | 1.000               | 0.661     |
| MDC-SIS                     | 0.750              | 0.078     | 0.971              | 0.205     | 1.000               | 0.661     |
| MV-SIS                      | 0.743              | 0.081     | 0.966              | 0.203     | 1.000               | 0.615     |
| LSLB                        | 0.400              | 0.022     | 0.668              | 0.052     | 0.983               | 0.303     |
| LSQB                        | 0.664              | 0.063     | 0.944              | 0.225     | 1.000               | 0.597     |
| ensemble ( $\delta = 0.6$ ) | 0.746              | 0.081     | 0.944              | 0.260     | 1.000               | 0.657     |
| ensemble ( $\delta = 0.7$ ) | 0.754              | 0.081     | 0.952              | 0.256     | 1.000               | 0.696     |
| ensemble ( $\delta = 0.8$ ) | 0.755              | 0.084     | 0.952              | 0.256     | 1.000               | 0.701     |
| Case (E)                    |                    |           |                    |           |                     |           |
| DC-SIS                      | 0.778              | 0.130     | 0.916              | 0.184     | 0.993               | 0.317     |
| MDC-SIS                     | 0.778              | 0.130     | 0.916              | 0.184     | 0.993               | 0.317     |
| MV-SIS                      | 0.767              | 0.127     | 0.912              | 0.156     | 0.989               | 0.306     |
| LSLB                        | 0.992              | 0.321     | 1.000              | 0.407     | 1.000               | 0.661     |
| LSQB                        | 0.853              | 0.057     | 0.927              | 0.048     | 1.000               | 0.139     |
| ensemble ( $\delta = 0.6$ ) | 0.989              | 0.319     | 0.992              | 0.401     | 1.000               | 0.658     |
| ensemble ( $\delta = 0.7$ ) | 0.989              | 0.319     | 0.992              | 0.401     | 1.000               | 0.658     |
| ensemble ( $\delta = 0.8$ ) | 0.989              | 0.319     | 0.992              | 0.401     | 1.000               | 0.657     |

ple 2 in Section 3.1 where the SIS-type methods fail. In this example of  $p_0 = 2$ , let  $(n, p) = (100, 200)$  with 198 noisy predictors from  $U(0, 1)^{198}$ , and the coverage rates of correct screening over 1000 repetitions of DC-SIS, MDC-SIS, LSLB, LSQB, and the ensemble methods with  $\delta = 0.6, 0.7$ , and  $0.8$  are 0.094, 0.101, 0.995, 0.922, 0.995, 0.995, and 0.892, respectively. From these simulation results, main findings are similar to those in the interpolation cases. The performance of ensemble screening is satisfactory even when the SIS-type methods or the linear screening methods fail. A different finding from the interpolation cases is that the selection of  $\delta$  influences the performance of ensemble screening. As shown in Section 3.2, the linear screening methods may perform poorly when the predictors are correlated, and thus we should select relative large  $\delta$  in ensemble screening. From Table S1 we can see that  $\delta = 0.8$  is a good choice for such cases.

## A.2 Classification

We now consider binary response  $y \in \{0, 1\}$  and the following five cases.

**Case (A):** Generate  $\mathbf{X}_1, \dots, \mathbf{X}_n$  as the ND in Section A.1.  $\rho = 0.5$ .  $y_1, \dots, y_n$  are independently generated from the Bernoulli distribution  $B(1, \text{pr}(\mathbf{X}_i))$ , where  $\text{pr}(\mathbf{X}_i) = \exp(-4 + 2 \sum_{j=1}^{p_0} X_{ij}) / [1 + \exp(-4 + 2 \sum_{j=1}^{p_0} X_{ij})]$

**Case (B):** Generate  $\mathbf{X}_1, \dots, \mathbf{X}_n$  as the ND in Case (A) but let  $\rho = 0.1$ .  $y_1, \dots, y_n$  are independently generated from the Bernoulli distribution  $B(1, \text{pr}(\mathbf{X}_i))$ , where  $\text{pr}(\mathbf{X}_i) = \exp(f(X_{i1}, \dots, X_{ip_0}) - 5) / [1 + \exp(f(X_{i1}, \dots, X_{ip_0}) - 5)]$ , where  $f$  is the weighted sphere function in Section 5.1.

**Case (C):** Generate the data in the same manner as in Case (B) except let  $\text{pr}(\mathbf{X}_i) = \Phi(f(X_{i1}, \dots, X_{ip_0}) - 5)$ .

**Case (D):** Generate  $\mathbf{X}_1, \dots, \mathbf{X}_n$  i.i.d.  $\sim 0.5N(-\mathbf{1}_p, \Sigma) + 0.5N(\mathbf{1}_p, \mathbf{I}_p)$  with  $\rho = 0.2$  in  $\Sigma$ .  $y_1, \dots, y_n$  are independently generated from the Bernoulli distribution  $B(1, \text{pr}(\mathbf{X}_i))$ , where  $\text{pr}(\mathbf{X}_i) = \exp(f(X_{i1}, \dots, X_{ip_0}) - 5) / [1 + \exp(f(X_{i1}, \dots, X_{ip_0}) - 5)]$  and  $f$  is Ackley's model.

**Case (E):** Generate the data in the same manner as in Case (D) except let  $\text{pr}(\mathbf{X}_i) = \Phi(f(X_{i1}, \dots, X_{ip_0}) - 100)$  and  $f$  is Zakharov's model.

Combinations of  $(n, p, p_0)$  used in the simulations are displayed in Table S2. Besides the methods compared in the previous two subsections, we add Cui, Li, and Zhong (2015)'s MV-SIS method which is a model-free feature screening approach for high dimensional discriminant analysis. The simulation results based on 1000 repetitions are presented in Table S2. We can see that, similar to the previous two subsections, the coverage rates of the proposed methods are close to the best one from the existing methods in most cases. In particular, they have much better overall performance than the SIS-type methods.

## B Proofs

**Lemma B.1.** *Under Assumption 1, for  $\mathcal{A} \subset \mathbb{Z}_p$ ,  $f_{\mathcal{A}} = f_{\mathcal{A} \cap \mathcal{A}_0}$ .*

*Proof.* To simplify the notation, let  $p = 3$ ,  $p_0 = 2$ , and  $\mathcal{A} = \{1, 3\}$ . The proof of the general case is almost the same. Let  $X_1, X_2, X_3$  be independent random variables distributed from  $U(0, 1)$ . By Assumption 1, we have  $f_{\mathcal{A}}(x_1, x_3) = E(f(X_1, X_2, X_3) | X_1 = x_1, X_3 = x_3) = E(f_{\mathcal{A}_0}(X_1, X_2) | X_1 = x_1, X_3 = x_3) = E(f_{\mathcal{A}_0}(X_1, X_2) | X_1 = x_1) = E(f(X_1, X_2, X_3) | X_1 = x_1) = f_{\mathcal{A} \cap \mathcal{A}_0}(x_1)$ .  $\square$

*Proof.* of Proposition 1. By Lemma 1 and Assumption 2,  $f_{\mathcal{A}} = f_{\mathcal{A} \cap \mathcal{A}_0} = f_{\mathcal{A}_0}$ , which implies  $\mathcal{A} = \mathcal{A}_0$ .  $\square$

It is obvious to obtain the following lemma.

**Lemma B.2.** *Under Assumption 3, for  $f, g \in L^2(\mathcal{I}^p) \cap L_P^2(\mathcal{I}^p)$ ,  $f =_P g$  if and only if  $f = g$ .*

*Proof.* of Proposition 2. (i) $\Rightarrow$ (ii): Note that  $f_{\mathcal{A}_0} \in L_P^2(\mathcal{I}^{\mathcal{A}_0})$  and  $f = f_{\mathcal{A}_0}$ . It follows that  $f_{\mathcal{A}_0} = f_{\mathcal{A}_0, P}$ , which implies  $f =_P f_{\mathcal{A}_0, P}$  by Lemma B.2. Similarly we can prove  $f_{\mathcal{A}} = f_{\mathcal{A}, P}$  for  $\mathcal{A} \subsetneq \mathcal{A}_0$ . Therefore,  $f_{\mathcal{A}, P} \neq f_{\mathcal{A}_0, P}$ , which implies  $f_{\mathcal{A}, P} \neq_P f_{\mathcal{A}_0, P}$  by Lemma B.2.

(ii) $\Rightarrow$ (i): Since  $f_{\mathcal{A}_0, P} \in L^2(\mathcal{I}^{\mathcal{A}_0})$ , we have  $f_{\mathcal{A}_0, P} = f_{\mathcal{A}_0}$ , which implies  $f = f_{\mathcal{A}_0}$ . Similarly we can prove  $f_{\mathcal{A}, P} = f_{\mathcal{A}}$  for  $\mathcal{A} \subsetneq \mathcal{A}_0$ , and thus  $f_{\mathcal{A}_0} \neq f_{\mathcal{A}}$ .  $\square$

**Lemma B.3.** *Under Assumptions 1-4,*

$$\begin{aligned}\beta_j(P) &= \left( \int_{\mathcal{I}^p} b(x_j) f_{\mathcal{A}_0}(\mathbf{x}_{\mathcal{A}_0}) \psi(\mathbf{x}) d\mathbf{x} - \zeta \int_{\mathcal{I}^p} f_{\mathcal{A}_0}(\mathbf{x}_{\mathcal{A}_0}) \psi(\mathbf{x}) d\mathbf{x} \right) / (\eta - \zeta^2) \quad \text{for } j = 1, \dots, p_0, \\ \beta_j(P) &= 0 \quad \text{for } j = p_0 + 1, \dots, p,\end{aligned}$$

where  $\zeta = \int_{\mathcal{I}} b(x) \varphi(x) dx$  and  $\eta = \int_{\mathcal{I}} b(x)^2 \varphi(x) dx$ .

*Proof.* Under Assumption 4,  $\mathbf{u} = \zeta \mathbf{1}_p$  and  $\Sigma = (\sigma_{ij})_{p \times p}$  with  $\sigma_{ii} = \eta$  for  $i = 1, \dots, p$  and  $\sigma_{ij} = \zeta^2$  for  $i \neq j$ . Some algebra gives

$$\begin{pmatrix} 1 & \mathbf{u}' \\ \mathbf{u} & \Sigma \end{pmatrix}^{-1} = \begin{pmatrix} 1 + p\zeta^2/(\eta - \zeta^2) & -\zeta \mathbf{1}_p' / (\eta - \zeta^2) \\ -\zeta \mathbf{1}_p / (\eta - \zeta^2) & \mathbf{I}_p / (\eta - \zeta^2) \end{pmatrix},$$

where  $\mathbf{I}_p$  denotes the  $p \times p$  identity matrix. By (5),

$$\beta(P) = -\frac{\zeta}{\eta - \zeta^2} \int_{\mathcal{I}^p} f(\mathbf{x}) \psi(\mathbf{x}) d\mathbf{x} + \frac{\mathbf{v}}{\eta - \zeta^2}. \quad (\text{B.1})$$

The result of the lemma for  $j = 1, \dots, p_0$  follows from (B.1) and Assumption 1. For  $j = p_0 + 1, \dots, p$ ,

$$\begin{aligned}& \int_{\mathcal{I}^{p_0+1}} b(x_j) f_{\mathcal{A}_0}(x_1, \dots, x_{p_0}) \varphi(x_1) \cdots \varphi(x_{p_0}) \varphi(x_j) dx_1 \cdots dx_{p_0} dx_j \\ &= \int_{\mathcal{I}} b(x_j) \varphi(x_j) dx_j \int_{\mathcal{I}^{p_0}} f_{\mathcal{A}_0}(x_1, \dots, x_{p_0}) \varphi(x_1) \cdots \varphi(x_{p_0}) dx_1 \cdots dx_{p_0} = \zeta \int_{\mathcal{I}^{p_0}} f_{\mathcal{A}_0}(\mathbf{x}) \psi(\mathbf{x}) d\mathbf{x},\end{aligned}$$

which implies  $\beta_j(P) = 0$ . □

*Proof.* of Proposition 4. This proposition follows from Lemma B.3 and Assumption 4. □

## References

- Cui, H., Li, R., and Zhong, W. (2015). Model-free feature screening for ultrahigh dimensional discriminant analysis, *Journal of the American Statistical Association*, 110: 630–641.
